# Supplementary material
Source: PubMed Central journal article supplement (PMC2938242)
Supplement: blood-2009-11-251801_1.pdf [file blood-2009-11-251801_1.pdf]

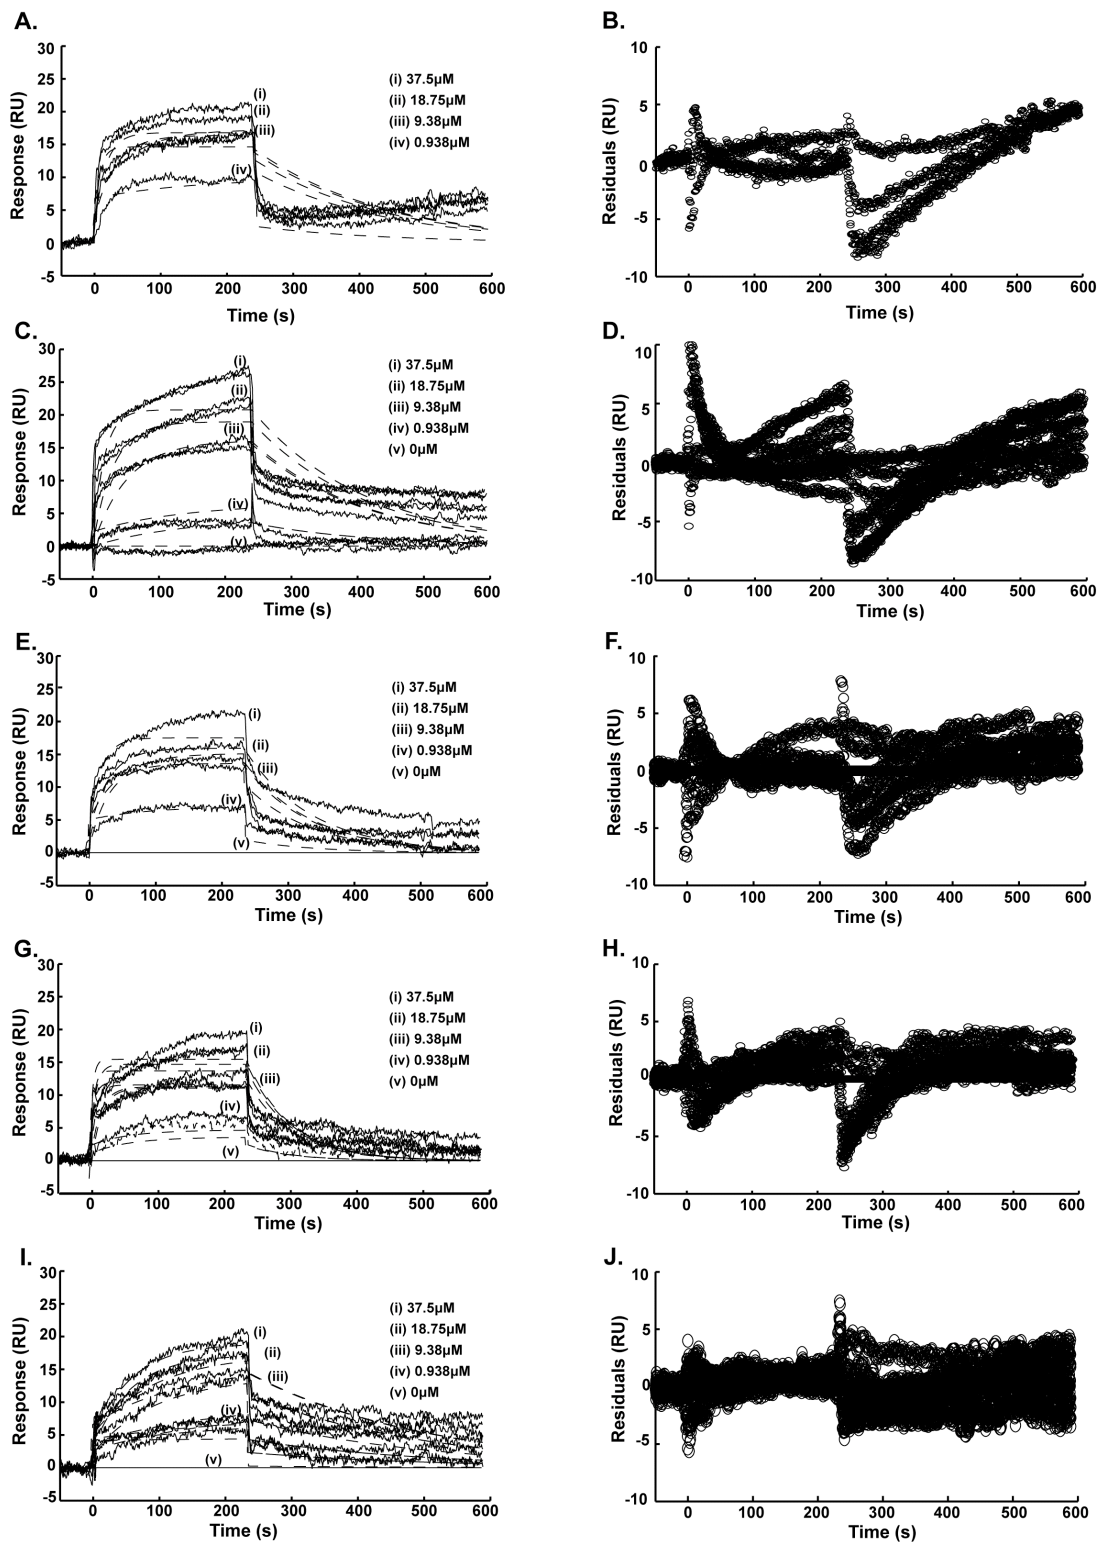

**Figure S1.** Experimental SPR sensorgrams with corresponding Langmuir 1:1 ligand model simulations (A, C, E, G, I) and residual plots (B, D, F, H, J); (A, B) GPRPAAC, (C, D) GPRFPAC, (E, F) GPRPPERC, (G, H) GPRVVERC, (I, J) GPRVVAAC. Solid lines = experimental SPR response curves, dashed lines = fitted model curves.

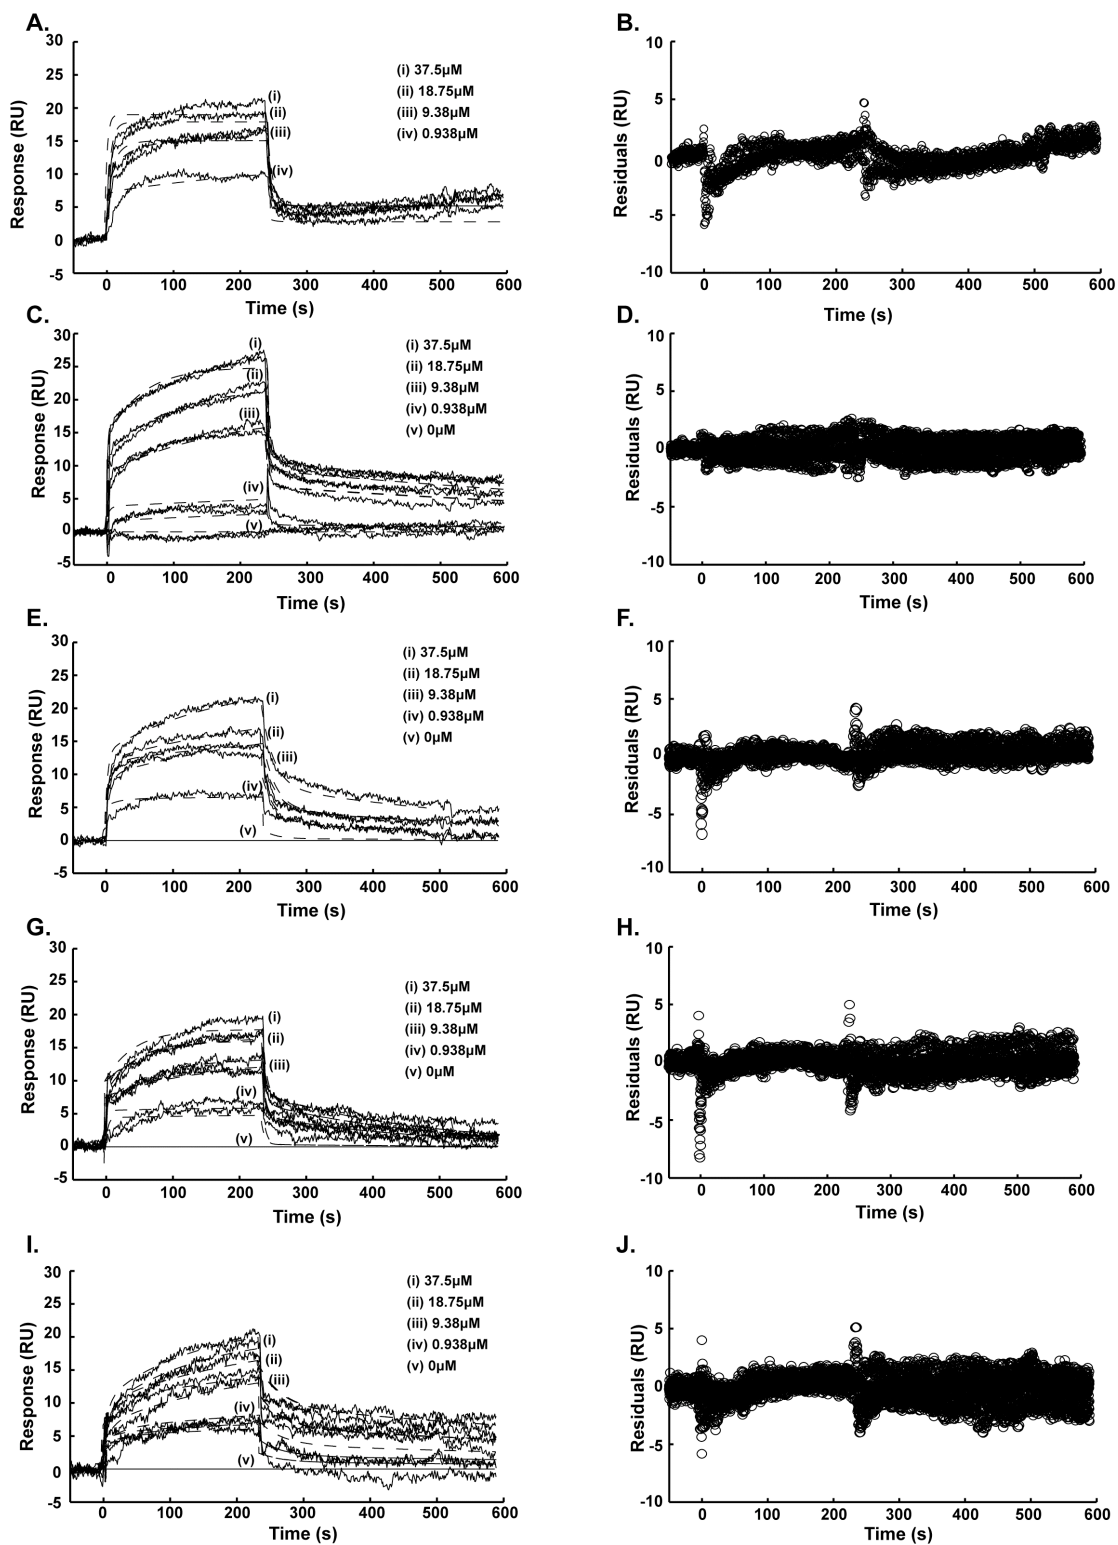

**Figure S2.** Experimental SPR sensorgrams with corresponding heterogeneous ligand model simulations (A, C, E, G, I) and residual plots (B, D, F, H, J); (A, B) GPRPAAC, (C, D) GPRPFAC, (E, F) GPRPPERC, (G, H) GPRVVERC, (I, J) GPRVVAAC. Solid lines = experimental SPR response curves, dashed lines = fitted model curves.

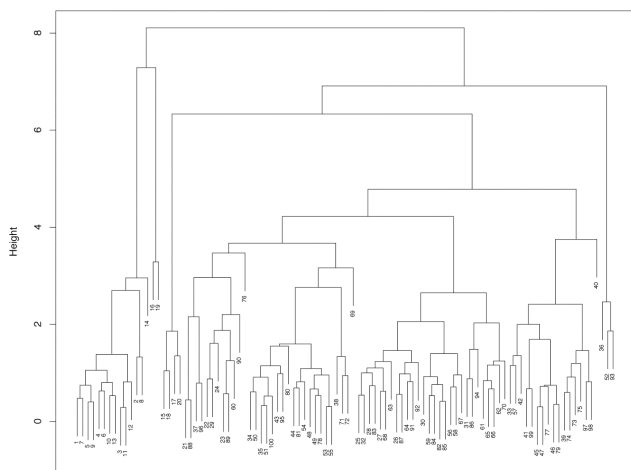

**A. GPRFPAC**

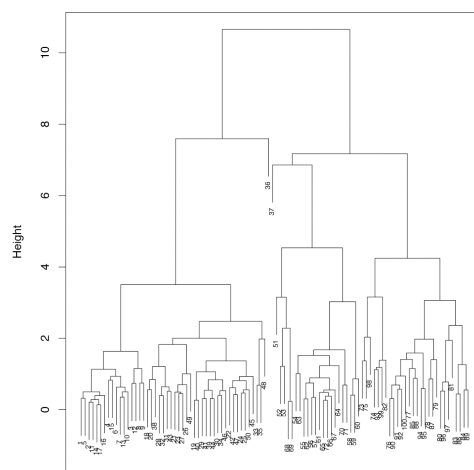

**B. GPRVAAC**

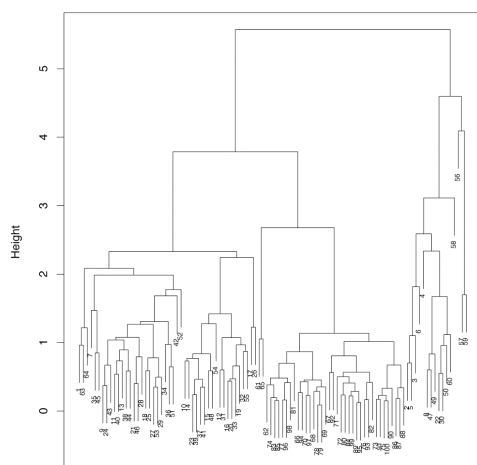

**C. GPRPAAC**

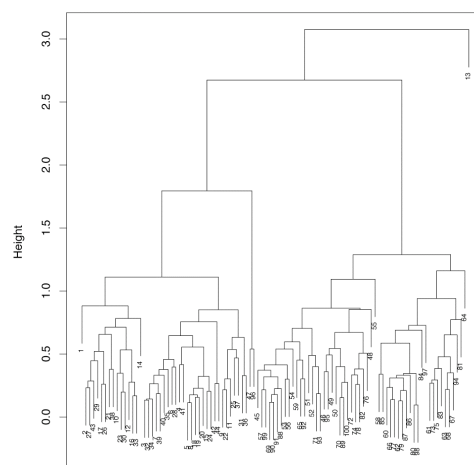

**D. GPRPPERC**

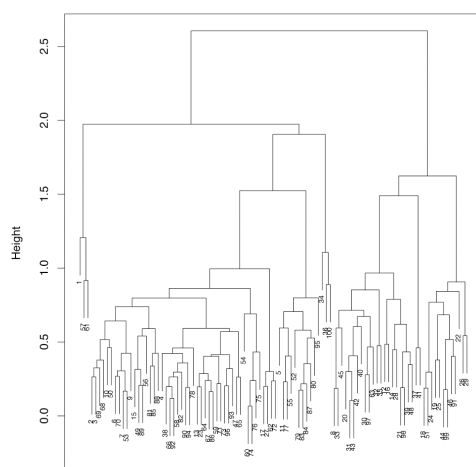

**E. GPRVVERC**

**Figure S3.** Dendrograms from hierarchical cluster analysis from a dissimilarity matrix generated from the RMSD between every frame in the trajectory, (A) GPRFPAC, (B) GPRVAAC, (C) GPRPAAC, (D) GPRPPERC, (E) GPRVVERC.

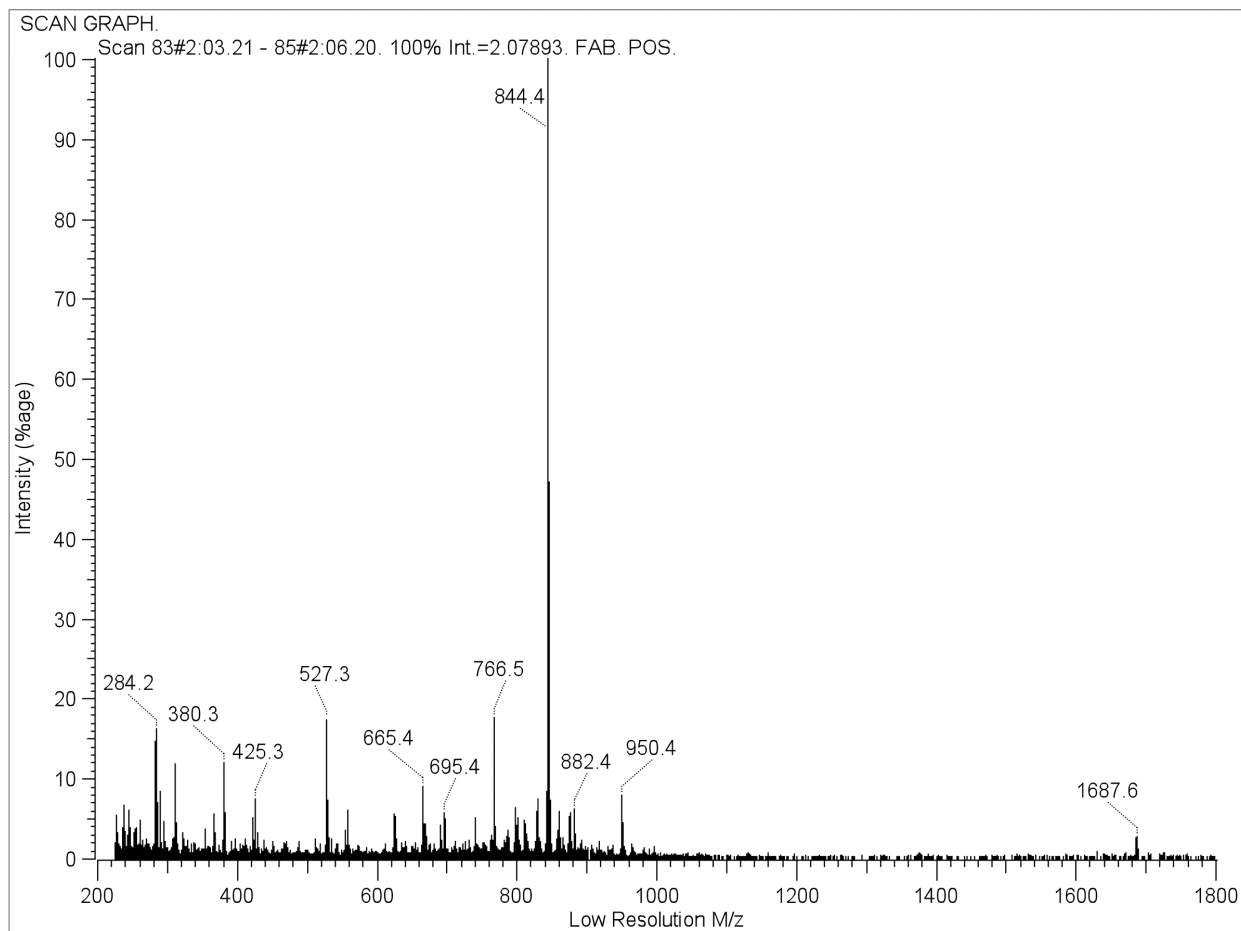

**Figure S4.** Representative fast atom bombardment (FAB) mass spectrometry analysis on GPRPFAC peptide solution remaining after a SPR experiment. The analysis revealed an intense ion peak at 844.4 presumably the  $[M+H]^+$  (nominal molecular weight = 843.4Da), indicative of a monomer peptide solution. Additionally, a minor intensity ion peak was at 1687.6, indicating minimal dimerization in the solution.
